# Supplementary material for: Cationic arene ruthenium(ii) complexes with chelating P-functionalized alkyl phenyl sulfide and sulfoxide ligands as potent anticancer agents
Source: Royal Society of Chemistry journal article supplement (doi:10.1039/c3dt33064h), 2013-01-01
Supplement: c3dt33064h.pdf [file c3dt33064h.pdf]

## Supplemental Material

### Cationic arene ruthenium(II) complexes with chelating *P*-functionalized alkyl phenyl sulfide and sulfoxide ligands as potent anticancer agents

Gerd Ludwig, Goran N. Kaluđerović, Tobias Ruffer, Martin Bette, Marcus Korb, Michael Block, Reinhard Paschke, Heinrich Lang and Dirk Steinborn

#### Experimental

##### Materials and methods

All reactions and manipulations were carried out under argon using standard Schlenk techniques. Solvents were dried (diethyl ether/*n*-pentane over Na/benzophenone; methanol over magnesium; methylene chloride over CaH<sub>2</sub>) and freshly distilled prior to use. NMR spectra (<sup>1</sup>H, <sup>13</sup>C, <sup>31</sup>P) were recorded at 27 °C on Varian Gemini 200 and VXR 400 spectrometers. Chemical shifts are relative to solvent signals (CD<sub>2</sub>Cl<sub>2</sub>, δ<sub>H</sub> 5.32, δ<sub>C</sub> 53.8) as internal references; δ(<sup>31</sup>P) is relative to external H<sub>3</sub>PO<sub>4</sub> (85%). Microanalyses (C, H) were performed in the Microanalytical Laboratory of the University of Halle using a CHNS-932 (LECO) elemental analyzer. [{RuCl<sub>2</sub>(η<sup>6</sup>-*p*-cym)}<sub>2</sub>] and the ligands were prepared according to literature procedures.<sup>1,2</sup>

##### Preparation of [Ru(η<sup>6</sup>-*p*-cym)Cl{Ph<sub>2</sub>P(CH<sub>2</sub>)<sub>*n*</sub>S(O)<sub>*x*</sub>Ph-κ*P*,κ*S*}][PF<sub>6</sub>] (1b–5b)

To a methanol solution (30 mL) of [{RuCl<sub>2</sub>(η<sup>6</sup>-*p*-cym)}<sub>2</sub>] (0.10 g, 0.16 mmol) the respective ligand (0.32 mmol) was added while stirring and then the solution was heated under reflux for 3 h. [NH<sub>4</sub>][PF<sub>6</sub>] (6 equiv.) was added and the precipitate obtained after storage at –70 °C overnight was filtered off, washed with diethyl ether (3 × 2 mL), and dried in vacuum.

**1b** (*n* = 1; *x* = 0). Yield: 169 mg (73%). Anal. Found: C, 47.74; H, 4.26. Calcd for C<sub>29</sub>H<sub>31</sub>ClF<sub>6</sub>P<sub>2</sub>RuS (724.03): C, 48.10; H, 4.32. <sup>1</sup>H NMR (400 MHz, CD<sub>2</sub>Cl<sub>2</sub>): δ 1.13 (d, <sup>3</sup>J<sub>H,H</sub> = 6.93 Hz, 3H, CH(CH<sub>3</sub>)<sub>2</sub>), 1.22 (d, <sup>3</sup>J<sub>H,H</sub> = 6.91 Hz, 3H, CH(CH<sub>3</sub>)<sub>2</sub>), 1.96 (s, 3H, CH<sub>3</sub>), 2.43–2.57 (m, 1H, CH(CH<sub>3</sub>)<sub>2</sub>), 4.91–5.02 (m, 1H, SCH<sub>2</sub>), 5.56–5.67 (m, 3H, C<sub>cym</sub>-H + SCH<sub>2</sub>), 5.83–5.94 (m, 2H, C<sub>cym</sub>-H), 7.46–7.63 (m, 15H, H<sub>Ph</sub>). <sup>13</sup>C NMR (100 MHz, CD<sub>2</sub>Cl<sub>2</sub>): δ 18.3 (s, CCH<sub>3</sub>), 21.4 (s, CH(CH<sub>3</sub>)<sub>2</sub>), 22.5 (s, CH(CH<sub>3</sub>)<sub>2</sub>), 31.5 (s, CH(CH<sub>3</sub>)<sub>2</sub>), 27.2 (d, <sup>1</sup>J<sub>P,C</sub> = 21.0 Hz, CH<sub>2</sub>PPh<sub>2</sub>), 86.5 (d, <sup>2</sup>J<sub>P,C</sub> = 5.7 Hz, 2/6-C<sub>cym</sub>), 88.0 (d, <sup>2</sup>J<sub>P,C</sub> = 5.7 Hz, 2/6-C<sub>cym</sub>), 89.2 (d, <sup>2</sup>J<sub>P,C</sub> = 4.3 Hz, 3/5-C<sub>cym</sub>), 91.6 (d, <sup>2</sup>J<sub>P,C</sub> = 4.3 Hz, 3/5-C<sub>cym</sub>), (s, CCH<sub>3</sub>), 102.9 (s, CCH(CH<sub>3</sub>)<sub>2</sub>),

114.5 (s, CCH<sub>3</sub>), 125.6–136.3 (C<sub>Ph</sub>). <sup>31</sup>P NMR (80 MHz, CD<sub>2</sub>Cl<sub>2</sub>): δ 0.35 (s), –142.9 (sept, <sup>1</sup>J<sub>P,F</sub> = 709.0 Hz, PF<sub>6</sub>).

**2b** (*n* = 2; *x* = 0). Yield: 158 mg (67%). Anal. Found: C, 48.49; H, 4.93. Calcd for C<sub>29</sub>H<sub>31</sub>ClF<sub>6</sub>P<sub>2</sub>RuS (738.04): C, 48.82; H, 4.51. <sup>1</sup>H NMR (400 MHz, C<sub>5</sub>D<sub>5</sub>N): δ 0.88 (d, <sup>3</sup>J<sub>H,H</sub> = 6.86 Hz, 3H, CH(CH<sub>3</sub>)<sub>2</sub>), 1.03 (d, <sup>3</sup>J<sub>H,H</sub> = 6.92 Hz, 3H, CH(CH<sub>3</sub>)<sub>2</sub>), 1.85 (s, 3H, CH<sub>3</sub>), 2.40 (sept, <sup>3</sup>J<sub>H,H</sub> = 6.92 Hz, 1H, CH(CH<sub>3</sub>)<sub>2</sub>), 2.87–2.97 (m, 1H, CH<sub>2</sub>PPh<sub>2</sub>), 3.11–3.20 (m, 1H, CH<sub>2</sub>PPh<sub>2</sub>), 3.45–3.68 (m, 2H, SCH<sub>2</sub>), 5.42–5.43 (m, 1H, C<sub>cym</sub>-H), 5.72–5.73 (m, 1H, C<sub>cym</sub>-H), 6.19 (br, 1H, C<sub>cym</sub>-H), 6.29–6.30 (m, 1H, C<sub>cym</sub>-H), 7.40–7.53 (m, 11H, H<sub>Ph</sub>), 7.90–7.95 (m, 2H, H<sub>Ph</sub>), 8.03–8.05 (m, 2H, H<sub>Ph</sub>). <sup>13</sup>C NMR (100 MHz, C<sub>5</sub>D<sub>5</sub>N): δ 17.3 (s, CCH<sub>3</sub>), 21.2 (s, CH(CH<sub>3</sub>)<sub>2</sub>), 22.2 (s, CH(CH<sub>3</sub>)<sub>2</sub>), 28.8 (d, <sup>1</sup>J<sub>P,C</sub> = 33.1 Hz, CH<sub>2</sub>PPh<sub>2</sub>), 30.5 (s, CH(CH<sub>3</sub>)<sub>2</sub>), 36.6 (s(br), SCH<sub>2</sub>), 89.6 (s(br), 2/6-C<sub>cym</sub>), 90.7 (s(br), 2/6-C<sub>cym</sub>), 91.1 (d, <sup>2</sup>J<sub>P,C</sub> = 2.3 Hz, 3/5-C<sub>cym</sub>), 95.1 (s(br), 3/5-C<sub>cym</sub>), 103.4 (s, CCH(CH<sub>3</sub>)<sub>2</sub>), 127.6–134.8 (C<sub>Ph</sub>). <sup>31</sup>P NMR (80 MHz, CDCl<sub>3</sub>): δ 66.5 (s), –142.7 (sept, <sup>1</sup>J<sub>P,F</sub> = 709.3 Hz, PF<sub>6</sub>).

**3b** (*n* = 3; *x* = 0). Yield: 199 mg (83%). Anal. Found: C, 49.84; H, 4.42. Calcd for C<sub>29</sub>H<sub>31</sub>ClF<sub>6</sub>P<sub>2</sub>RuS (752.11): C, 49.50; H, 4.69. <sup>1</sup>H NMR (400 MHz, CDCl<sub>3</sub>): δ 0.40 (d, <sup>3</sup>J<sub>H,H</sub> = 6.84 Hz, 3H, CH(CH<sub>3</sub>)<sub>2</sub>), 1.03 (d, <sup>3</sup>J<sub>H,H</sub> = 7.08 Hz, 3H, CH(CH<sub>3</sub>)<sub>2</sub>), 1.24–1.35 (m, 1H, CH<sub>2</sub>CH<sub>2</sub>CH<sub>2</sub>), 1.79–1.86 (m, 1H, CH<sub>2</sub>CH<sub>2</sub>CH<sub>2</sub>), 2.07 (s, 3H, CH<sub>3</sub>), 2.16–2.33 (m, 2H, CH(CH<sub>3</sub>)<sub>2</sub>+CH<sub>2</sub>PPh<sub>2</sub>), 2.68–2.72 (m, 1H, SOCH<sub>2</sub>), 3.27–3.34 (m, 1H, CH<sub>2</sub>PPh<sub>2</sub>), 3.94–3.99 (m, 1H, SOCH<sub>2</sub>), 4.96–4.98 (m, 1H, C<sub>cym</sub>-H), 5.11–5.12 (m, 1H, C<sub>cym</sub>-H), 5.47–5.48 (m, 1H, C<sub>cym</sub>-H), 5.51–5.52 (m, 1H, C<sub>cym</sub>-H), 7.51–7.56 (m, 6H, H<sub>Ph</sub>), 7.63–7.65 (m, 5H, H<sub>Ph</sub>), 7.68–7.72 (m, 2H, H<sub>Ph</sub>), 8.18–8.20 (m, 2H, H<sub>Ph</sub>). <sup>13</sup>C NMR (100 MHz, CDCl<sub>3</sub>): δ 17.3 (s, CCH<sub>3</sub>), 18.9 (s, CH(CH<sub>3</sub>)<sub>2</sub>), 21.4 (s, CH(CH<sub>3</sub>)<sub>2</sub>), 22.7 (s, CH<sub>2</sub>CH<sub>2</sub>CH<sub>2</sub>), 23.6 (d, <sup>1</sup>J<sub>P,C</sub> = 31.9 Hz, CH<sub>2</sub>PPh<sub>2</sub>), 30.3 (s, CH(CH<sub>3</sub>)<sub>2</sub>), 35.2 (d, <sup>3</sup>J<sub>P,C</sub> = 2.3 Hz, SCH<sub>2</sub>), 89.2 (d, <sup>2</sup>J<sub>P,C</sub> = 8.1 Hz, 2/6-C<sub>cym</sub>), 93.2 (d, <sup>2</sup>J<sub>P,C</sub> = 7.4 Hz, 2/6-C<sub>cym</sub>), 93.9 (m, 3/5-C<sub>cym</sub>), 99.6 (d, <sup>2</sup>J<sub>P,C</sub> = 3.5 Hz, 3/5-C<sub>cym</sub>), 116.0 (s, CCH(CH<sub>3</sub>)<sub>2</sub>), 129.0–137.7 (C<sub>Ph</sub>). <sup>31</sup>P NMR (80 MHz, CDCl<sub>3</sub>): δ 20.5 (s), –142.9 (sept, <sup>1</sup>J<sub>P,F</sub> = 710.6 Hz, PF<sub>6</sub>).

**4b** (*n* = 2; *x* = 1). Yield: 188 mg (78%). Anal. Found: C, 47.31; H, 4.25. Calcd for C<sub>29</sub>H<sub>31</sub>ClF<sub>6</sub>P<sub>2</sub>RuS (754.04): C, 47.78; H, 4.41. <sup>1</sup>H NMR (400 MHz, CDCl<sub>3</sub>): δ 1.04 (d, <sup>3</sup>J<sub>H,H</sub> = 6.93 Hz, 3H, CH(CH<sub>3</sub>)<sub>2</sub>), 1.14 (d, <sup>3</sup>J<sub>H,H</sub> = 6.91 Hz, 3H, CH(CH<sub>3</sub>)<sub>2</sub>), 1.51 (s, 3H, CH<sub>3</sub>), 2.37–2.44 (m, 1H, CH(CH<sub>3</sub>)<sub>2</sub>), 2.99–3.06 (m, 2H, CH<sub>2</sub>PPh<sub>2</sub>), 3.52–3.65 (m, 1H, SOCH<sub>2</sub>), 4.00–4.07 (m, 1H, SOCH<sub>2</sub>), 5.62 (d, <sup>3</sup>J<sub>H,H</sub> = 5.95 Hz, 1H, C<sub>cym</sub>-H), 5.79 (d, <sup>3</sup>J<sub>H,H</sub> = 5.92 Hz,

2H,  $C_{\text{cym-H}}$ ), 6.11 (d,  $^3J_{\text{H,H}} = 5.77$  Hz, 1H,  $C_{\text{cym-H}}$ ), 7.51–7.52 (m, 5H,  $H_{\text{Ph}}$ ), 7.60–7.81 (m, 8H,  $H_{\text{Ph}}$ ), 8.26–8.28 (m, 2H,  $H_{\text{Ph}}$ ).  $^{13}\text{C}$  NMR (100 MHz,  $\text{CDCl}_3$ ):  $\delta$  16.9 (s,  $\text{CCH}_3$ ), 21.4 (s,  $\text{CH}(\text{CH}_3)_2$ ), 21.5 (s,  $\text{CH}(\text{CH}_3)_2$ ), 25.3 (d,  $^1J_{\text{P,C}} = 31.4$  Hz,  $\text{CH}_2\text{PPh}_2$ ), 30.8 (s,  $\text{CH}(\text{CH}_3)_2$ ), 59.5 (d,  $^2J_{\text{P,C}} = 4.7$  Hz,  $\text{SOCH}_2$ ), 89.9 (d,  $^2J_{\text{P,C}} = 1.0$  Hz, 2/6- $C_{\text{cym}}$ ), 92.8 (d,  $^2J_{\text{P,C}} = 6.0$  Hz, 2/6- $C_{\text{cym}}$ ), 95.4 (d,  $^2J_{\text{P,C}} = 1.78$  Hz, 3/5- $C_{\text{cym}}$ ), 95.4 (d,  $^2J_{\text{P,C}} = 1.78$  Hz, 3/5- $C_{\text{cym}}$ ), 105.7 (s,  $\text{CCH}(\text{CH}_3)_2$ ), 124.2–144.7 ( $C_{\text{Ph}}$ ).  $^{31}\text{P}$  NMR (80 MHz,  $\text{CDCl}_3$ ):  $\delta$  73.0 (s), –142.8 (sept,  $^1J_{\text{P,F}} = 711.2$  Hz,  $\text{PF}_6$ ).

**5b** ( $n = 3$ ;  $x = 1$ ). Yield: 181 mg (74%). Anal. Found: C, 47.92; H, 4.34. Calcd for  $\text{C}_{29}\text{H}_{31}\text{ClF}_6\text{P}_2\text{RuS}$  (768.11): C, 48.47; H, 4.59.  $^1\text{H}$  NMR (400 MHz,  $\text{CDCl}_3$ ):  $\delta$  0.01 (d,  $^3J_{\text{H,H}} = 6.79$  Hz, 3H,  $\text{CH}(\text{CH}_3)_2$ ), 0.75 (d,  $^3J_{\text{H,H}} = 7.14$  Hz, 3H,  $\text{CH}(\text{CH}_3)_2$ ), 1.23 (s, 3H,  $\text{CH}_3$ ), 1.66–1.88 (m, 3H,  $\text{CH}_2\text{CH}_2\text{CH}_2 + \text{CH}_2\text{PPh}_2$ ), 1.97–2.07 (m, 1H,  $\text{CH}(\text{CH}_3)_2$ ), 2.50–2.55 (m, 1H,  $\text{SOCH}_2$ ), 2.91–3.00 (m, 1H,  $\text{CH}_2\text{PPh}_2$ ), 3.79–3.86 (m, 1H,  $\text{SOCH}_2$ ), 4.79 (d,  $^3J_{\text{H,H}} = 6.02$  Hz, 1H,  $C_{\text{cym-H}}$ ), 5.18 (dd,  $^3J_{\text{H,H}} = 6.70$  Hz, 2H,  $C_{\text{cym-H}}$ ), 5.34 (d,  $^3J_{\text{H,H}} = 6.70$  Hz, 1H,  $C_{\text{cym-H}}$ ), 5.34 (dd,  $^3J_{\text{H,H}} = 5.58$  Hz, 1H,  $C_{\text{cym-H}}$ ), 7.24–7.30 (m, 5H,  $H_{\text{Ph}}$ ), 7.33–7.43 (m, 6H,  $H_{\text{Ph}}$ ), 7.52–7.57 (m, 2H,  $H_{\text{Ph}}$ ), 7.92–7.94 (m, 2H,  $H_{\text{Ph}}$ ).  $^{13}\text{C}$  NMR (100 MHz,  $\text{CDCl}_3$ ):  $\delta$  16.6 (s,  $\text{CCH}_3$ ), 17.95 (s,  $\text{CH}(\text{CH}_3)_2$ ), 18.0 (s,  $\text{CH}(\text{CH}_3)_2$ ), 22.6 (s,  $\text{CH}_2\text{CH}_2\text{CH}_2$ ), 23.2 (d,  $^1J_{\text{P,C}} = 32.6$  Hz,  $\text{CH}_2\text{PPh}_2$ ), 30.8 (s,  $\text{CH}(\text{CH}_3)_2$ ), 54.9 (d,  $^3J_{\text{P,C}} = 2.3$  Hz,  $\text{SOCH}_2$ ), 92.04 (s, 2/6- $C_{\text{cym}}$ ), 92.7 (s, 2/6- $C_{\text{cym}}$ ), 93.9 (d,  $^2J_{\text{P,C}} = 8.1$  Hz, 3/5- $C_{\text{cym}}$ ), 102.8 (s,  $\text{CCH}(\text{CH}_3)_2$ ), 104.2 (d,  $^2J_{\text{P,C}} = 4.9$  Hz, 3/5- $C_{\text{cym}}$ ), 124.4–149.5 ( $C_{\text{Ph}}$ ).  $^{31}\text{P}$  NMR (80 MHz,  $\text{CDCl}_3$ ):  $\delta$  25.0 (s), –143.0 (sept,  $^1J_{\text{P,F}} = 710.5$  Hz,  $\text{PF}_6$ ).

### X-ray crystallography

Data for X-ray diffraction analyses of single crystals of **1b**· $\text{CH}_2\text{Cl}_2$  were collected on a Stoe-IPDS 2T diffractometer at 200 K and of **4b**· $\text{CH}_2\text{Cl}_2$  and **5b**· $\text{CH}_2\text{Cl}_2$  on an Oxford Gemini S diffractometer at 110 K using Mo- $K\alpha$  radiation ( $\lambda = 0.71073$  Å, graphite monochromator). Data for X-ray diffraction analyses of single crystals of **2b**· $\text{Me}_2\text{CO}$  and **3b** were collected on an Oxford Gemini S diffractometer at 116 K using Cu- $K\alpha$  radiation ( $\lambda = 1.54184$  Å, graphite monochromator). A summary of the crystallographic data, the data collection parameters and the refinement parameters are given in Table S3. Multiscan corrections were applied using the PLATON program package ( $T_{\text{min}}/T_{\text{max}}$ : 0.68/0.92, **1b**· $\text{CH}_2\text{Cl}_2$ ) and SCALE3 ABSPACK (0.66/1.00 **2b**· $\text{C}_3\text{H}_6\text{O}$ ; 0.58/1.00, **3b**; 0.82/1.00 **4b**· $\text{CH}_2\text{Cl}_2$ ; 0.95/1.00, **5b**), respectively.<sup>3,4</sup> The structures were solved with direct methods using SHELXS-97 and refined using full-matrix least-square routines against  $F^2$  with SHELXL-97.<sup>5,6</sup> All non-hydrogen atoms were refined

with anisotropic displacement parameters and hydrogen atoms with isotropic ones. H atoms were placed in calculated positions according to the riding model. In complex **2b**·C<sub>3</sub>H<sub>6</sub>O four F atoms of the hexafluorophosphate anion were found to be disordered over two positions with occupancies of 70% and 30%. Furthermore, some restraints had to be used for the refinement of the solvent molecule acetone (DELU, SIMU, ISOR). CCDC 911007–911011 contains the supplementary crystallographic data for this paper. These data can be obtained free of charge from the Cambridge Crystallographic Data Centre via [www.ccdc.cam.ac.uk/data\\_request/cif](http://www.ccdc.cam.ac.uk/data_request/cif).

### ***In vitro* antitumoral studies**

#### **Cell lines, culture conditions, and preparation of drug solutions**

The cell lines 518A2, 8505C, A253, MCF-7, and SW480 were kindly provided by Dr. Thomas Müller, Department of Hematology/Oncology, Martin Luther University of Halle-Wittenberg, Halle (Saale), Germany. Cultures were maintained as monolayers in RPMI 1640 (PAA Laboratories, Pasching, Austria) supplemented with 10% fetal bovine serum (Biochrom AG, Berlin, Germany) and penicillin/streptomycin (PAA Laboratories) at 37 °C in a humidified atmosphere with 5% of CO<sub>2</sub>. Stock solutions of investigated compounds were prepared in dimethylsulfoxide (DMSO, Sigma Aldrich) at a concentration of 20 mM, filtered through Millipore filter, 0.22 µm, before use, and diluted by a nutrient medium to various working concentrations. Nutrient medium was RPMI-1640 (PAA Laboratories) supplemented with 10% fetal bovine serum (Biochrom AG) and penicillin/streptomycin (PAA Laboratories).

#### **Cytotoxicity assay**

The cytotoxic activities of the compounds were evaluated using the sulforhodamine-B (SRB) (Sigma Aldrich, Germany) microculture colorimetric assay.<sup>7</sup> The cells were treated with serial dilutions of the compounds (0 to 300 µM) for 96 h and the assay was performed in triplicate. The final concentration of DMSO solvent never exceeded 0.5% at which it was non-toxic to the cells. Absorbance was measured at 570 nm using a 96-well plate reader (Tecan Spectra, Crailsheim, Germany). The IC<sub>50</sub> values were estimated from the semilogarithmic dose-response curves.

## Results

### Tables

**Table S1** Selected NMR spectroscopic data ( $\delta$  in ppm,  $J$  in Hz) of  $[\text{Ru}(\eta^6\text{-}p\text{-cym})\text{Cl}\{\text{Ph}_2\text{P}(\text{CH}_2)_n\text{S}(\text{O})_x\text{Ph-}\kappa\text{P},\kappa\text{S}}\}\text{[PF}_6\text{]}]$  (**1b–5b**).

| $x$      | $(n = 1) \text{Ph}_2\text{PC}_\alpha\text{H}_2\text{S}(\text{O})_x\text{Ph}$ |                                              |                       | $(n = 2) \text{Ph}_2\text{PC}_\beta\text{H}_2\text{C}_\alpha\text{H}_2\text{S}(\text{O})_x\text{Ph}$ |                                              |                                             | $(n = 3) \text{Ph}_2\text{PC}_\gamma\text{H}_2\text{C}_\beta\text{H}_2\text{C}_\alpha\text{H}_2\text{S}(\text{O})_x\text{Ph}$ |    |                                              |                                              |                       |
|----------|------------------------------------------------------------------------------|----------------------------------------------|-----------------------|------------------------------------------------------------------------------------------------------|----------------------------------------------|---------------------------------------------|-------------------------------------------------------------------------------------------------------------------------------|----|----------------------------------------------|----------------------------------------------|-----------------------|
|          |                                                                              | $\delta_{\alpha\text{-C}}(^1J_{\text{P,C}})$ | $\delta_{\text{P}}^a$ |                                                                                                      | $\delta_{\alpha\text{-C}}(^2J_{\text{P,C}})$ | $\delta_{\beta\text{-C}}(^1J_{\text{P,C}})$ | $\delta_{\text{P}}^a$                                                                                                         |    | $\delta_{\alpha\text{-C}}(^3J_{\text{P,C}})$ | $\delta_{\gamma\text{-C}}(^1J_{\text{P,C}})$ | $\delta_{\text{P}}^a$ |
| <b>0</b> | 1b                                                                           | 27.2 (21.0)                                  | 0.3<br>(31.3)         | 2b                                                                                                   | 36.6                                         | 28.8 (33.1)                                 | 66.5<br>(22.6)                                                                                                                | 3b | 35.2 (2.3)                                   | 23.6 (31.9)                                  | 20.5<br>(24.5)        |
| <b>1</b> | –                                                                            | –                                            | –                     | 4b                                                                                                   | 59.5 (4.7)                                   | 25.3 (31.4)                                 | 73.0<br>(23.7)                                                                                                                | 5b | 54.9 (2.3)                                   | 23.2 (32.6)                                  | 25.0<br>(24.7)        |

<sup>a</sup> For comparison,  $\delta_{\text{P}}$  of the requisite neutral complexes<sup>8</sup> is given in parentheses.

**Table S2** For comparison  $\text{IC}_{50}$  values<sup>a</sup> (in  $\mu\text{M}$ ) of neutral ruthenium(II) arene complexes of the type  $[\text{Ru}(\eta^6\text{-}p\text{-cymene})\text{Cl}_2\{\text{Ph}_2\text{P}(\text{CH}_2)_n\text{S}(\text{O})_x\text{Ph-}\kappa\text{P}}\}]$  (**1a–5a**) having the  $\text{P}^{\text{O}}\text{S}(\text{O})_x$  ligands  $\kappa\text{P}$  coordinated are given, taken from Ref. <sup>8</sup>.

| Compound  | $n/x$ | <b>518A2</b>     | <b>8505C</b>     | <b>A253</b>      | <b>MCF-7</b>     | <b>SW480</b>     |
|-----------|-------|------------------|------------------|------------------|------------------|------------------|
| <b>1a</b> | 1/0   | $1.82 \pm 0.52$  | $2.85 \pm 0.13$  | $1.66 \pm 0.28$  | $6.55 \pm 0.50$  | $3.47 \pm 0.01$  |
| <b>2a</b> | 2/0   | $2.55 \pm 0.14$  | $3.90 \pm 0.37$  | $3.01 \pm 0.11$  | $1.37 \pm 0.31$  | $2.64 \pm 0.07$  |
| <b>3a</b> | 3/0   | $3.02 \pm 0.06$  | $3.64 \pm 0.13$  | $3.94 \pm 0.11$  | $1.75 \pm 0.45$  | $2.68 \pm 0.10$  |
| <b>4a</b> | 2/1   | $18.56 \pm 0.43$ | $28.59 \pm 0.82$ | $26.78 \pm 0.35$ | $10.47 \pm 1.17$ | $19.53 \pm 1.39$ |
| <b>5a</b> | 3/1   | $14.31 \pm 3.55$ | $12.02 \pm 1.04$ | $13.93 \pm 1.54$ | $1.79 \pm 0.39$  | $11.86 \pm 3.26$ |
| cisplatin |       | $1.52 \pm 0.19$  | $5.02 \pm 0.23$  | $0.81 \pm 0.02$  | $2.03 \pm 0.11$  | $3.24 \pm 0.21$  |

<sup>a</sup> Mean values  $\pm$  SD (standard deviation) from three experiments.

**Table S3.** Crystallographic data, data collection parameters, and refinement parameters for **1b**·CH<sub>2</sub>Cl<sub>2</sub>, **2b**·C<sub>3</sub>H<sub>6</sub>O, **3b**, **4b**·CH<sub>2</sub>Cl<sub>2</sub> and **5b**.

|                                                      | <b>1b</b> ·CH <sub>2</sub> Cl <sub>2</sub>                                                              | <b>2b</b> ·Me <sub>2</sub> CO                                                                       | <b>3b</b>                                                           | <b>4b</b> ·CH <sub>2</sub> Cl <sub>2</sub>                                                               | <b>5b</b>                                                            |
|------------------------------------------------------|---------------------------------------------------------------------------------------------------------|-----------------------------------------------------------------------------------------------------|---------------------------------------------------------------------|----------------------------------------------------------------------------------------------------------|----------------------------------------------------------------------|
| Empirical formula                                    | C <sub>29</sub> H <sub>31</sub> ClF <sub>6</sub> P <sub>2</sub> RuS<br>·CH <sub>2</sub> Cl <sub>2</sub> | C <sub>30</sub> H <sub>33</sub> ClF <sub>6</sub> P <sub>2</sub> RuS·C <sub>3</sub> H <sub>6</sub> O | C <sub>31</sub> H <sub>35</sub> ClF <sub>6</sub> P <sub>2</sub> RuS | C <sub>30</sub> H <sub>33</sub> ClF <sub>6</sub> OP <sub>2</sub> RuS<br>·CH <sub>2</sub> Cl <sub>2</sub> | C <sub>31</sub> H <sub>35</sub> ClF <sub>6</sub> OP <sub>2</sub> RuS |
| <i>M<sub>r</sub></i>                                 | 808.98                                                                                                  | 796.16                                                                                              | 752.11                                                              | 796.55                                                                                                   | 768.11                                                               |
| Crystal System                                       | Triclinic                                                                                               | Orthorhombic                                                                                        | triclinic                                                           | monoclinic                                                                                               | triclinic                                                            |
| Space group                                          | <i>P</i> -1                                                                                             | <i>P</i> 2 <sub>1</sub> 2 <sub>1</sub>                                                              | <i>P</i> -1                                                         | <i>P</i> 2 <sub>1</sub> / <i>c</i>                                                                       | <i>P</i> -1                                                          |
| <i>a</i> / Å                                         | 10.148(2)                                                                                               | 11.0143(2)                                                                                          | 10.2594(5)                                                          | 11.0122(4)                                                                                               | 10.0603(2)                                                           |
| <i>b</i> / Å                                         | 10.774(3)                                                                                               | 13.0922(2)                                                                                          | 11.9436(7)                                                          | 10.8492(3)                                                                                               | 12.0758(3)                                                           |
| <i>c</i> / Å                                         | 16.677(6)                                                                                               | 23.2592(4)                                                                                          | 12.9600(8)                                                          | 27.1047(9)                                                                                               | 13.1404(3)                                                           |
| <i>α</i> / °                                         | 81.18(2)                                                                                                |                                                                                                     | 83.578(5)                                                           |                                                                                                          | 83.783(2)                                                            |
| <i>β</i> / °                                         | 79.32(2)                                                                                                |                                                                                                     | 80.047(5)                                                           | 99.695(4)                                                                                                | 80.719(2)                                                            |
| <i>γ</i> / °                                         | 68.398(17)                                                                                              |                                                                                                     | 88.023(5)                                                           |                                                                                                          | 87.902(2)                                                            |
| <i>V</i> / Å <sup>3</sup>                            | 1658.8(8)                                                                                               | 3354.01(1)                                                                                          | 1554.14(2)                                                          | 3192.05(2)                                                                                               | 1565.92(6)                                                           |
| <i>Z</i>                                             | 2                                                                                                       | 4                                                                                                   | 2                                                                   | 4                                                                                                        | 2                                                                    |
| <i>D</i> <sub>cal</sub> / g·cm <sup>-3</sup>         | 1.620                                                                                                   | 1.657                                                                                               | 1.607                                                               | 1.657                                                                                                    | 1.629                                                                |
| <i>μ</i> (Mo/Cu-Kα) / mm <sup>-1</sup>               | 0.928 (Mo)                                                                                              | 6.530 (Cu)                                                                                          | 6.984 (Cu)                                                          | 0.885 (Mo)                                                                                               | 0.816 (Mo)                                                           |
| <i>F</i> (000)                                       | 816                                                                                                     | 1624                                                                                                | 764                                                                 | 1612                                                                                                     | 780                                                                  |
| <i>θ</i> range / °                                   | 2.66–25.00                                                                                              | 3.80–65.55                                                                                          | 3.48–65.25                                                          | 2.96–25.50                                                                                               | 3.04–26.00                                                           |
| Rfln collected                                       | 12855                                                                                                   | 13165                                                                                               | 9237                                                                | 11975                                                                                                    | 21224                                                                |
| Rfln observed [ <i>I</i> > 2σ( <i>I</i> )]           | 4584                                                                                                    | 5267                                                                                                | 4559                                                                | 5144                                                                                                     | 5707                                                                 |
| Rfln independent                                     | 5709                                                                                                    | 5672                                                                                                | 5210                                                                | 5930                                                                                                     | 6126                                                                 |
|                                                      | ( <i>R</i> <sub>int</sub> = 0.0476)                                                                     | ( <i>R</i> <sub>int</sub> = 0.0350)                                                                 | ( <i>R</i> <sub>int</sub> = 0.0344)                                 | ( <i>R</i> <sub>int</sub> = 0.0286)                                                                      | ( <i>R</i> <sub>int</sub> = 0.0211)                                  |
| Data/restraints/parameters                           | 5709/0/391                                                                                              | 5672/48/425                                                                                         | 5210/0/379                                                          | 5930/1/397                                                                                               | 6126/0/388                                                           |
| Goodness-of-fit on <i>F</i> <sup>2</sup>             | 0.961                                                                                                   | 1.013                                                                                               | 1.026                                                               | 1.036                                                                                                    | 1.034                                                                |
| <i>R</i> 1, <i>wR</i> 2 [ <i>I</i> > 2σ( <i>I</i> )] | 0.0395, 0.0967                                                                                          | 0.0377, 0.0898                                                                                      | 0.0427, 0.1039                                                      | 0.0302, 0.0732                                                                                           | 0.0207, 0.0491                                                       |
| <i>R</i> 1, <i>wR</i> 2 (all data)                   | 0.0502, 0.0997                                                                                          | 0.0400, 0.0905                                                                                      | 0.0481, 0.1059                                                      | 0.0371, 0.0766                                                                                           | 0.0232, 0.0501                                                       |
| Largest diff. peak and hole/ e Å <sup>-3</sup>       | 1.054 and -0.911                                                                                        | 0.849 and -0.690                                                                                    | 1.086 and -0.891                                                    | 0.523 and -0.758                                                                                         | 0.373 and -0.396                                                     |

## Figures

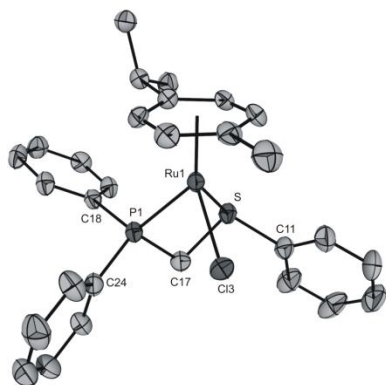

**Fig. S1** Molecular structure of the cation in crystals of  $[\text{Ru}(\eta^6\text{-}p\text{-cym})\text{Cl}\{\text{Ph}_2\text{P}(\text{CH}_2)_2\text{SPh-}\kappa\text{P},\kappa\text{S}}][\text{PF}_6]\cdot\text{CH}_2\text{Cl}_2$ , **1b**· $\text{CH}_2\text{Cl}_2$ . The ellipsoids are shown with a probability of 50%. H atoms have been omitted for clarity. Selected structural parameters (distances in Å, angles in °): Ru–Cl 2.381(1), Ru–P 2.314(1), Ru–S 2.390(1), Cl–Ru–P 83.3(4), Cl–Ru–S 88.2(4), S–Ru–P 70.6(4), C17–S–C11 103.1(2).

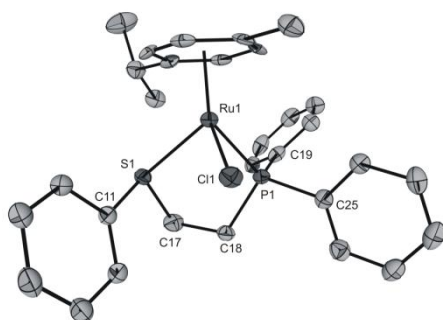

**Fig. S2** Molecular structure of the cation in crystals of  $[\text{Ru}(\eta^6\text{-}p\text{-cym})\text{Cl}\{\text{Ph}_2\text{P}(\text{CH}_2)_2\text{SPh-}\kappa\text{P},\kappa\text{S}}][\text{PF}_6]\cdot\text{C}_3\text{H}_6\text{O}$ , **2b**· $\text{Me}_2\text{CO}$ . The ellipsoids are shown with a probability of 50%. H atoms have been omitted for clarity. Selected structural parameters (distances in Å, angles in °): Ru–Cl 2.386(1), Ru–P 2.318(1), Ru–S 2.354(1), Cl–Ru–P 83.6(4), Cl–Ru–S 90.4(4), S–Ru–P 85.5(4), C11–S–C17 104.8(2).

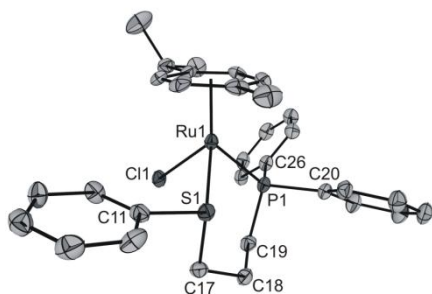

**Fig. S3** Molecular structure of the cation in crystals of  $[\text{Ru}(\eta^6\text{-}p\text{-cym})\text{Cl}\{\text{Ph}_2\text{P}(\text{CH}_2)_3\text{SPh-}\kappa\text{P},\kappa\text{S}}][\text{PF}_6]$ , **3b**. The ellipsoids are shown with a probability of 50%. H atoms have been omitted for clarity. Selected structural parameters (distances in Å, angles in °): Ru–Cl 2.404(9), Ru–P 2.348(9), Ru–S 2.362(9), Cl–Ru–P 88.2(4), Cl–Ru–S 90.9(3), S–Ru–P 88.1(3), C11–S–C17 99.7(2).

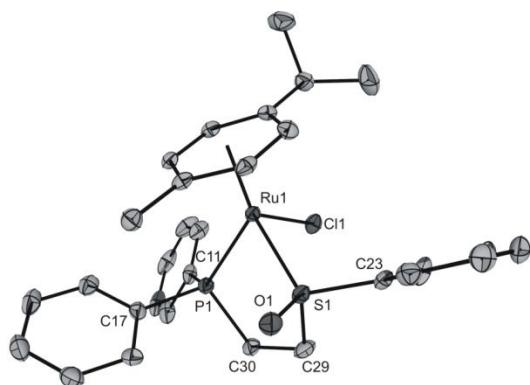

**Fig. S4** Molecular structure of the cation in crystals of  $[\text{Ru}(\eta^6\text{-}p\text{-cym})\text{Cl}\{\text{Ph}_2\text{P}(\text{CH}_2)_2\text{S}(\text{O})\text{Ph-}\kappa P, \kappa S\}][\text{PF}_6] \cdot \text{CH}_2\text{Cl}_2$ , **4b**· $\text{CH}_2\text{Cl}_2$ . The ellipsoids are shown with a probability of 50%. H atoms have been omitted for clarity. Selected structural parameters (distances in Å, angles in °): Ru–Cl 2.398(6), Ru–P 2.312(7), Ru–S 2.262(7), Cl–Ru–P 84.0(2), Cl–Ru–S 88.5(2), S–Ru–P 81.4(2), C29–S–C23 103.1(1)

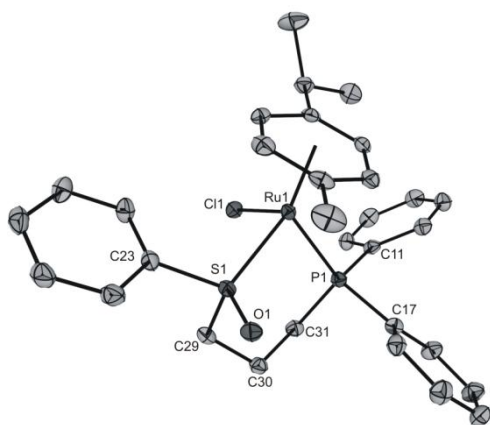

**Fig. S5** Molecular structure of the cation in crystals of  $[\text{Ru}(\eta^6\text{-}p\text{-cym})\text{Cl}\{\text{Ph}_2\text{P}(\text{CH}_2)_3\text{S}(\text{O})\text{Ph-}\kappa P, \kappa S\}][\text{PF}_6]$ , **5b**. The ellipsoids are shown with a probability of 50%. H atoms have been omitted for clarity. Selected structural parameters (distances in Å, angles in °): Ru–Cl 2.400(4), Ru–P 2.349(4), Ru–S 2.285(4), Cl–Ru–P 83.4(2), Cl–Ru–S 89.4(2), S–Ru–P 88.8(2), C29–S–C23 100.6(8).



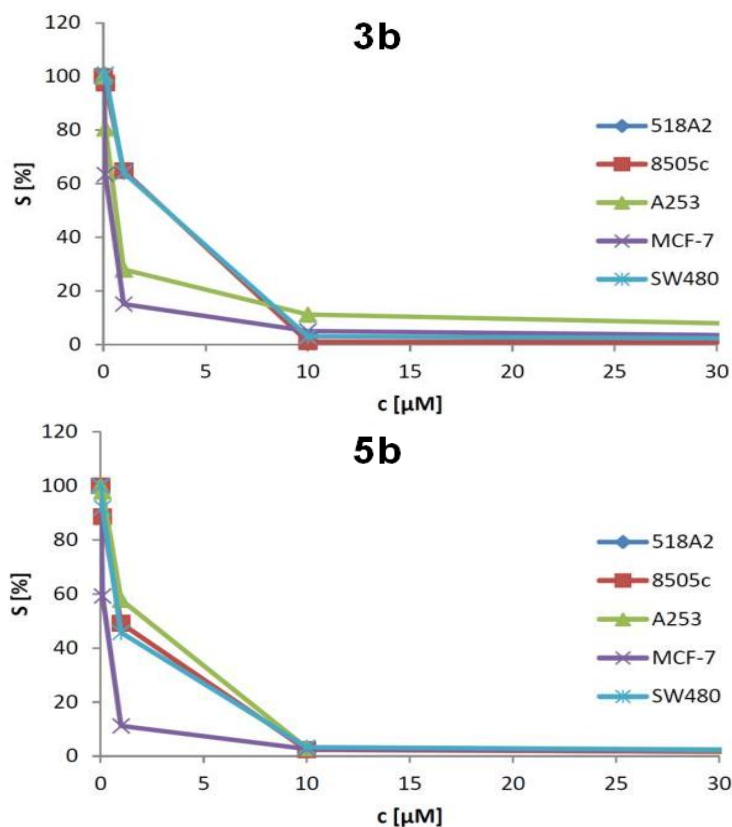

**Fig. S6** Representative graphs showing survival (in %) of cells growth for 96 h in the presence of increasing concentrations of compounds **3b** and **5b**.

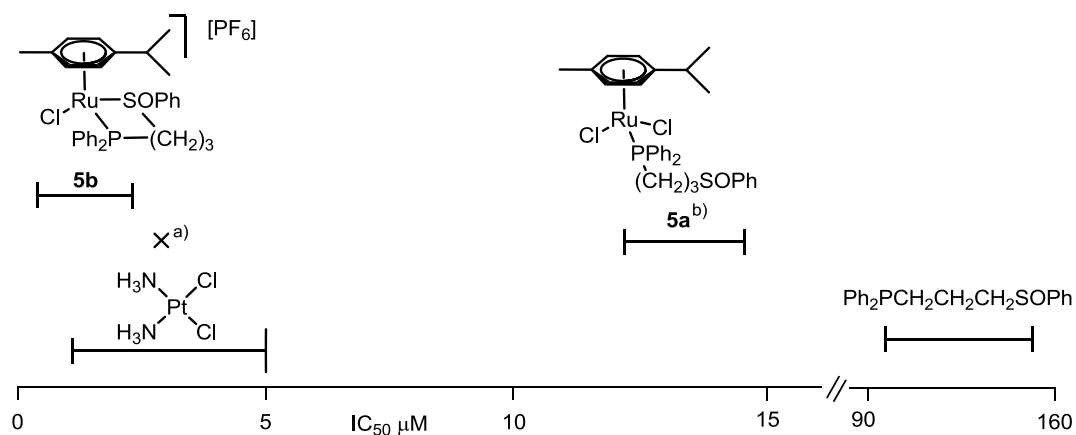

**Fig. S7** Range of cytotoxicities of the cationic ruthenium complex **5b** against five cell lines (see Table 2) in comparison with the activities of the corresponding neutral complex **5a**, the noncoordinated ligand, and cisplatin. a) Cytotoxicity of **5a** against one cell line (MCF-7). b) Cytotoxicities of **5a** against four cell lines (518A2, 8505C, A253, SW480).

## References

---

- 1 M. Valderrama, R. Contreras, D. Boys, *Polyhedron.*, 1997, **16**, 1811.
- 2 M. Block, M. Bette, C. Wagner, D. Steinborn, *Z. Anorg. Allg. Chem.*, 2011, **637**, 206–210.
- 3 (a) MULscanABS, PLATON for Windows Taskbar v1.15, University of Glasgow, 2008 (b) A. L. Spek, *J. Appl. Cryst.*, 2003, **36**, 7.
- 4 SCALE3 ABSPACK, Empirical Absorption Correction, CrysAlis–Software package, Oxford Diffraction Ltd. 2006.
- 5 G. M. Sheldrick, SHELXS-97, Program for Crystal Structure Solution. University of Göttingen, Göttingen, 1998.
- 6 G. M. Sheldrick, SHELXL-97, Program for the Refinement of Crystal Structures. University of Göttingen, Göttingen, 1997.
- 7 P. Skehan, R. Storeng, D. Scudiero, A. Monks, J. McMahon, D. Vistica, J.T. Warren, H. Bokesch, S. Kenney, M.R. Boyd, *J. Natl. Cancer Inst.*, 1990, **82**, 1107–1112.
- 8 G. Ludwig, G. N. Kaluđerović, M. Bette, D. Steinborn, *J. Inorg. Biochem.*, 2012, **113**, 77.
